# Supplementary material
Source: publisher site journal article supplement (https://www.dovepress.com/article/278705)
Supplement: Supplementary file 1 [file get_supplementary_file.php]

Supplementary appendix

CONTENT

[**Figure 1**](#_Toc48305849)

[**Figure S1 1**](#_Toc48305850)

[**Figure S2 2**](#_Toc48305851)

[**Figure S3 5**](#_Toc48305852)

[**Figure S4 6**](#_Toc48305853)

[**Table 7**](#_Toc48305854)

[**Table S1 7**](#_Toc48305855)

[**Table S2 8**](#_Toc48305856)

# Figure

**Figure S1**

**
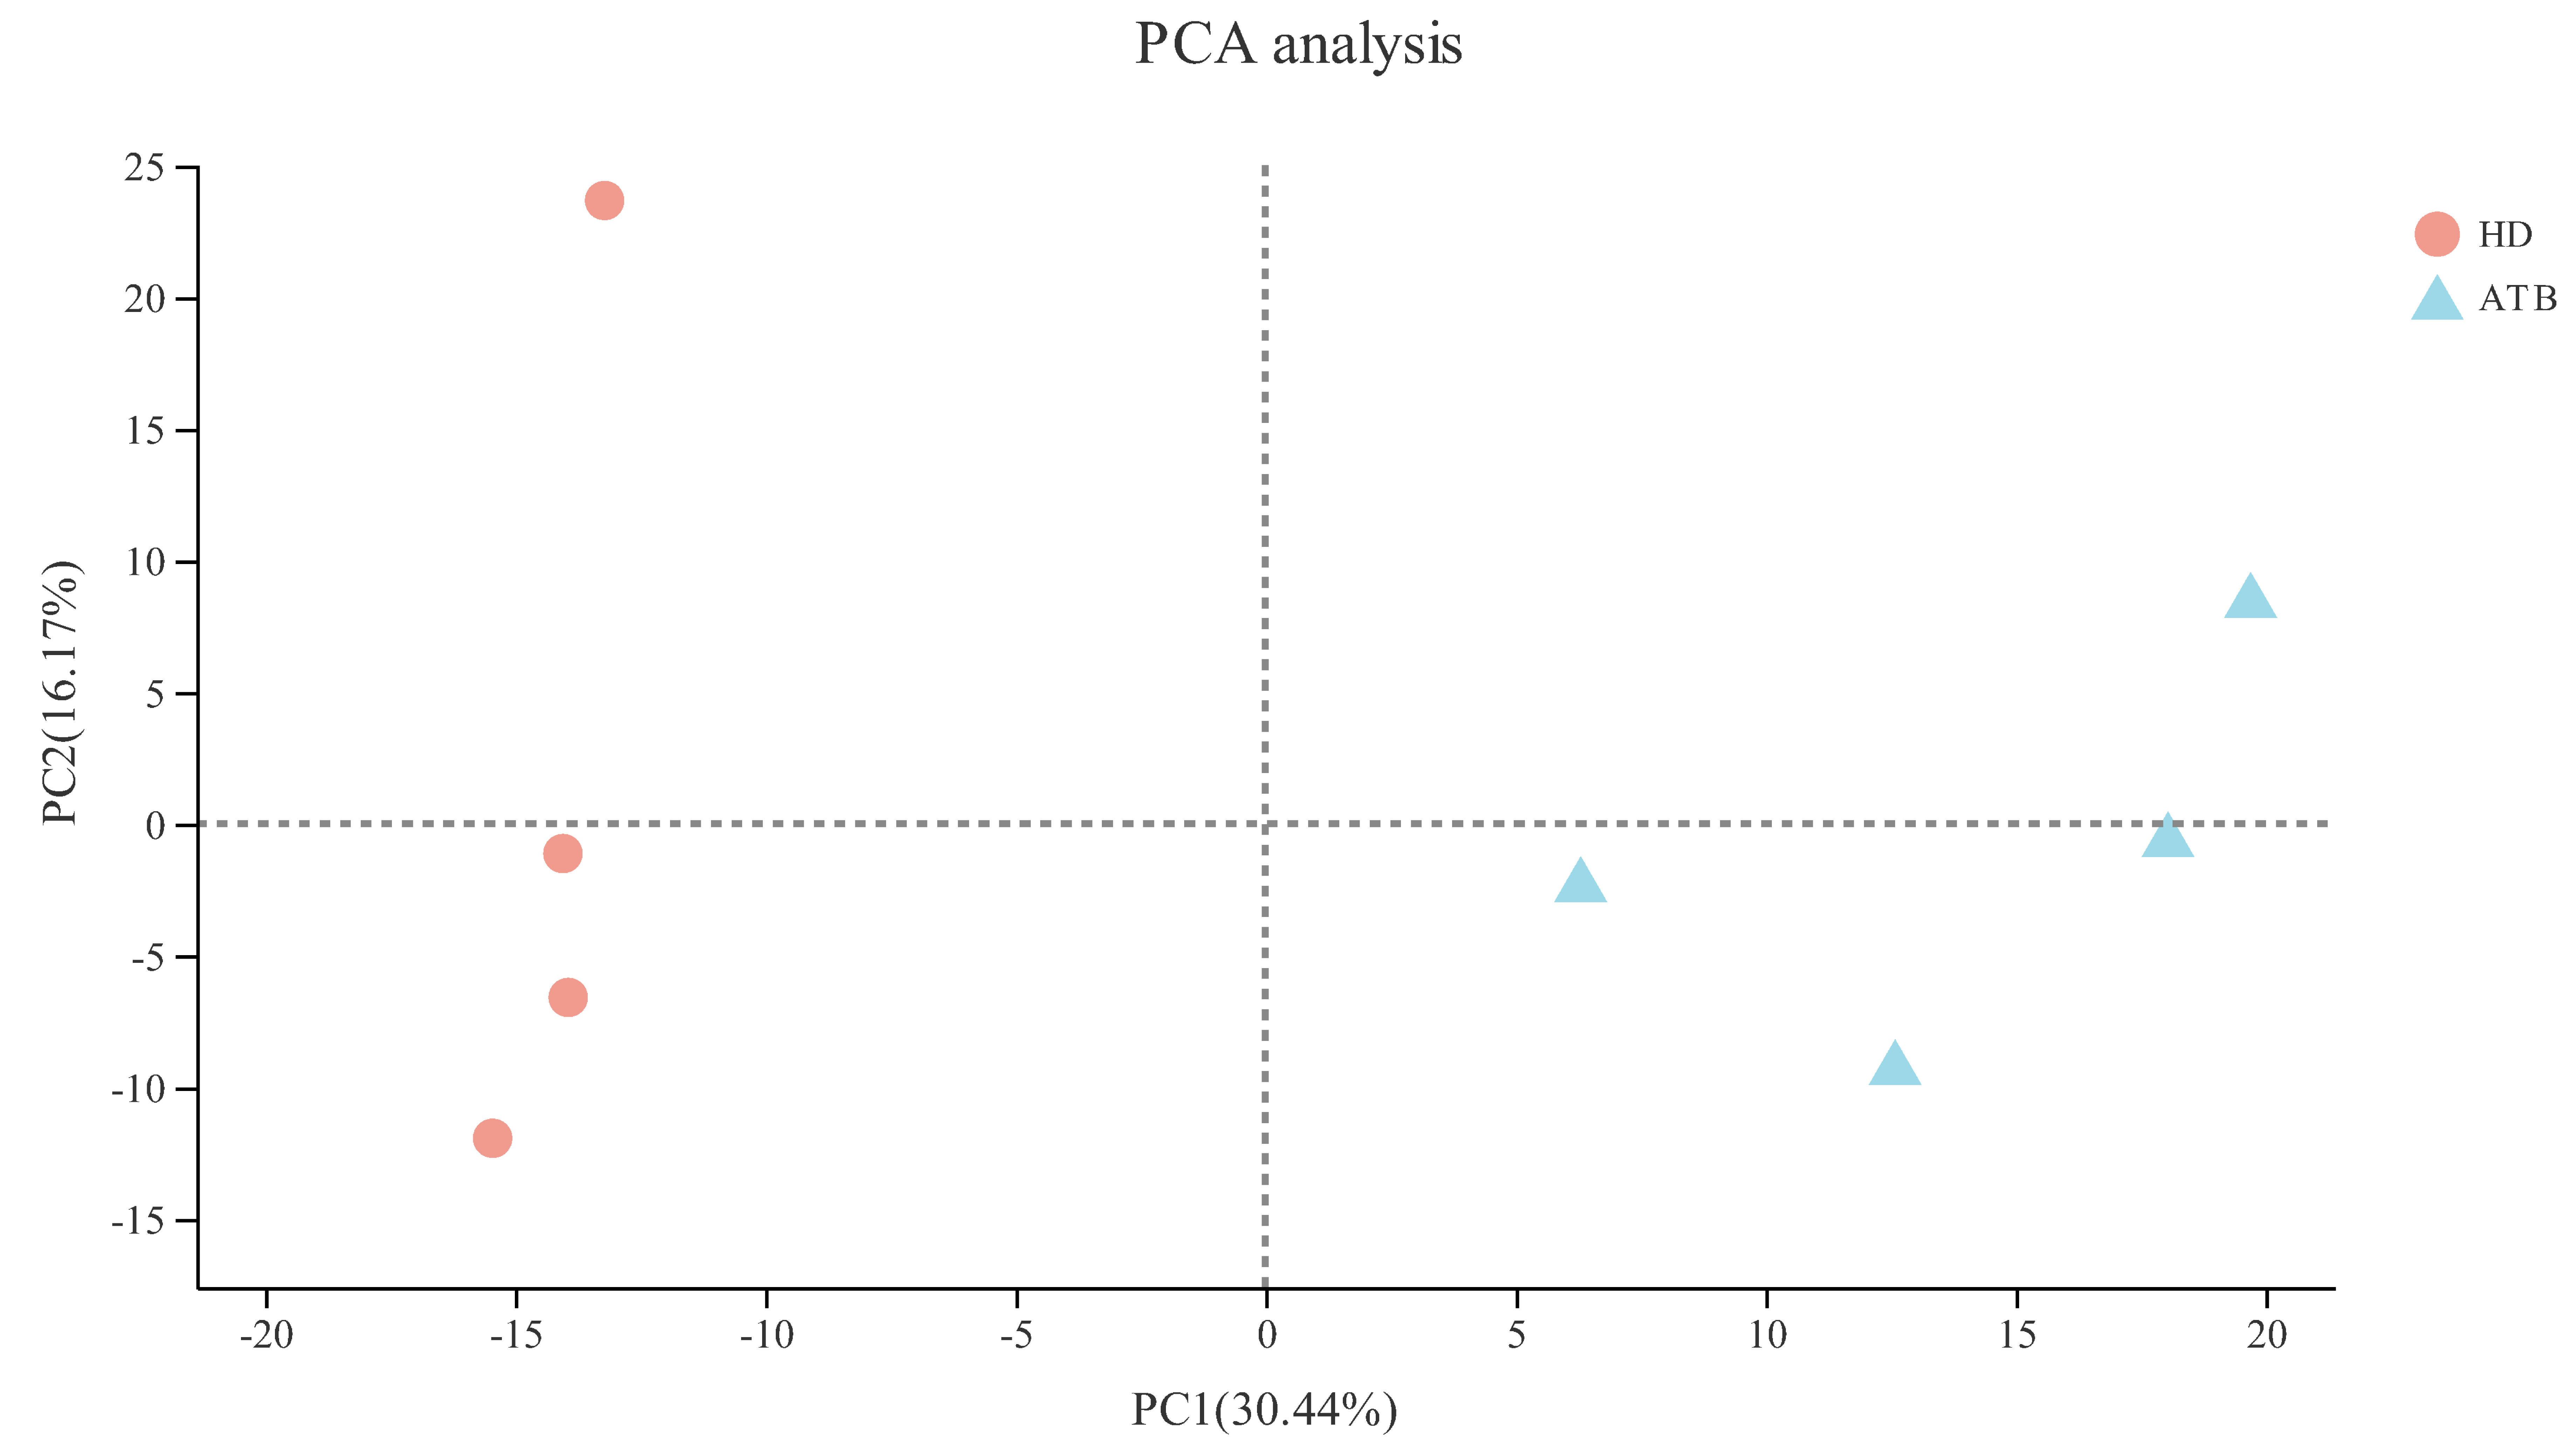
**

Principal component analysis (PCA) of mRNA expression in ATB and healthy donors. The red represents HD samples, the blue represents ATB samples.

**Figure S2**

**
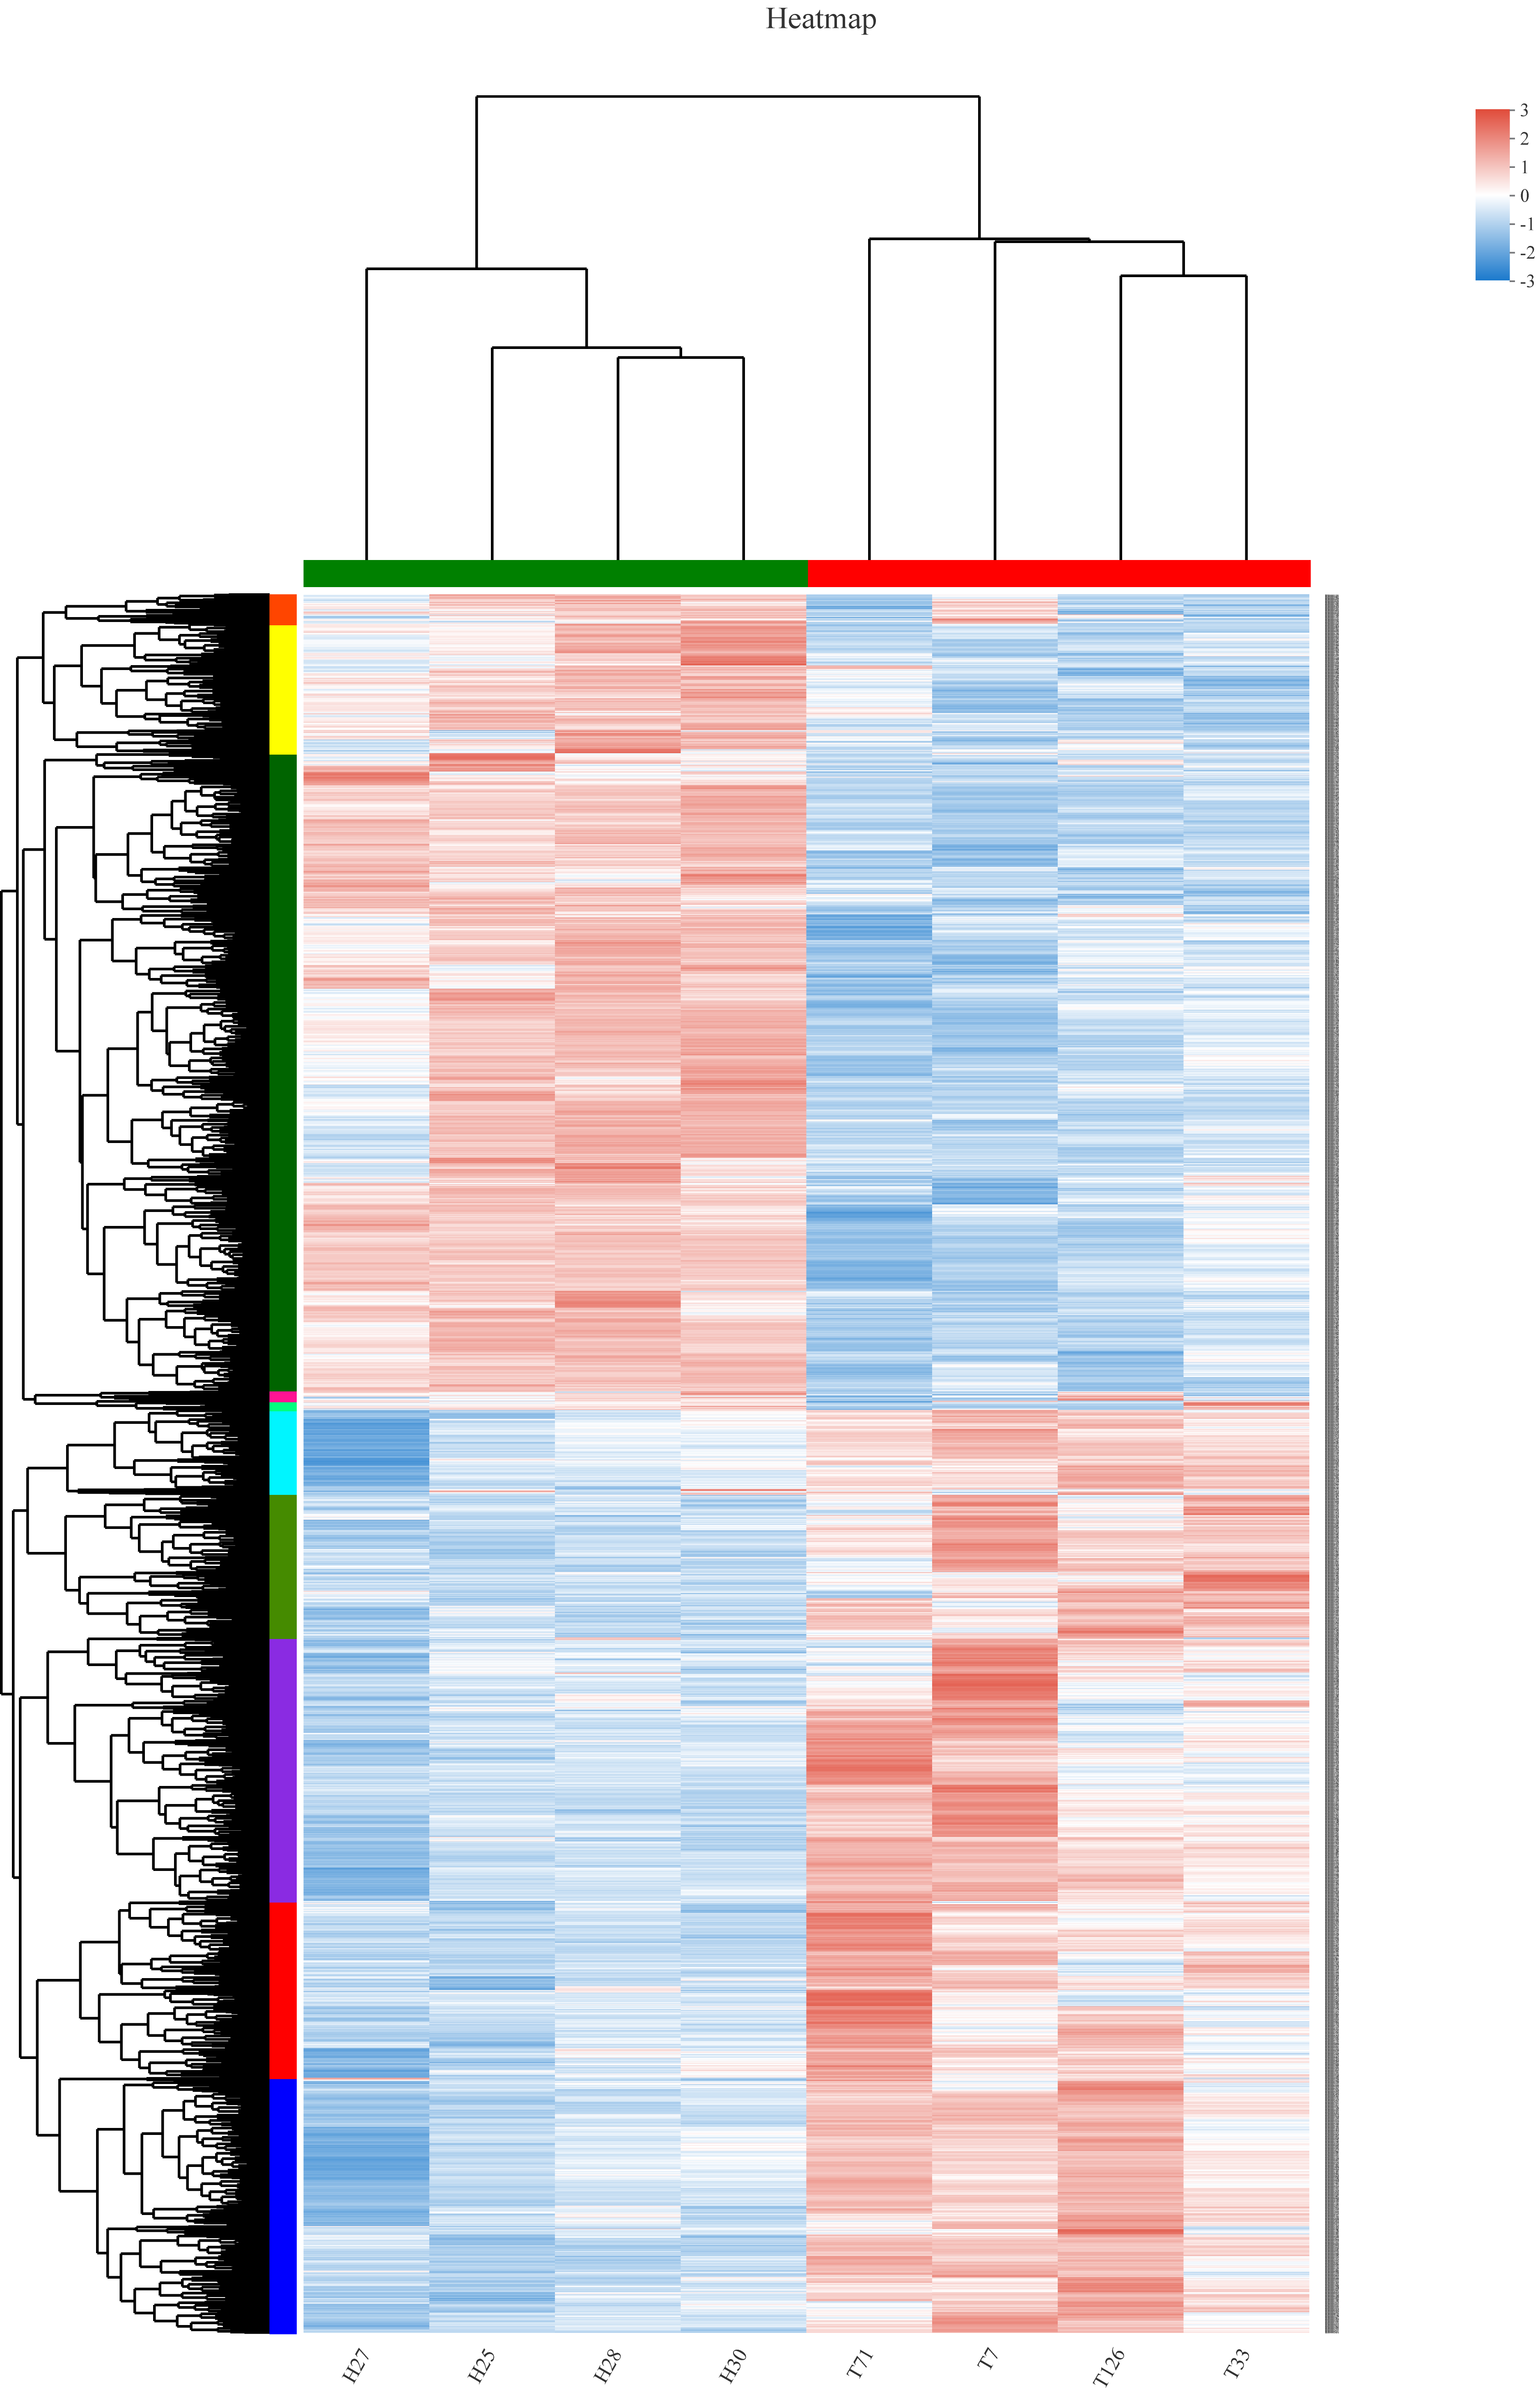
**

Hierarchical clustering of active tuberculosis and healthy donors by differentially expressed mRNAs. Each row represents one mRNA, and each column represents one sample.

**Figure S3**

**
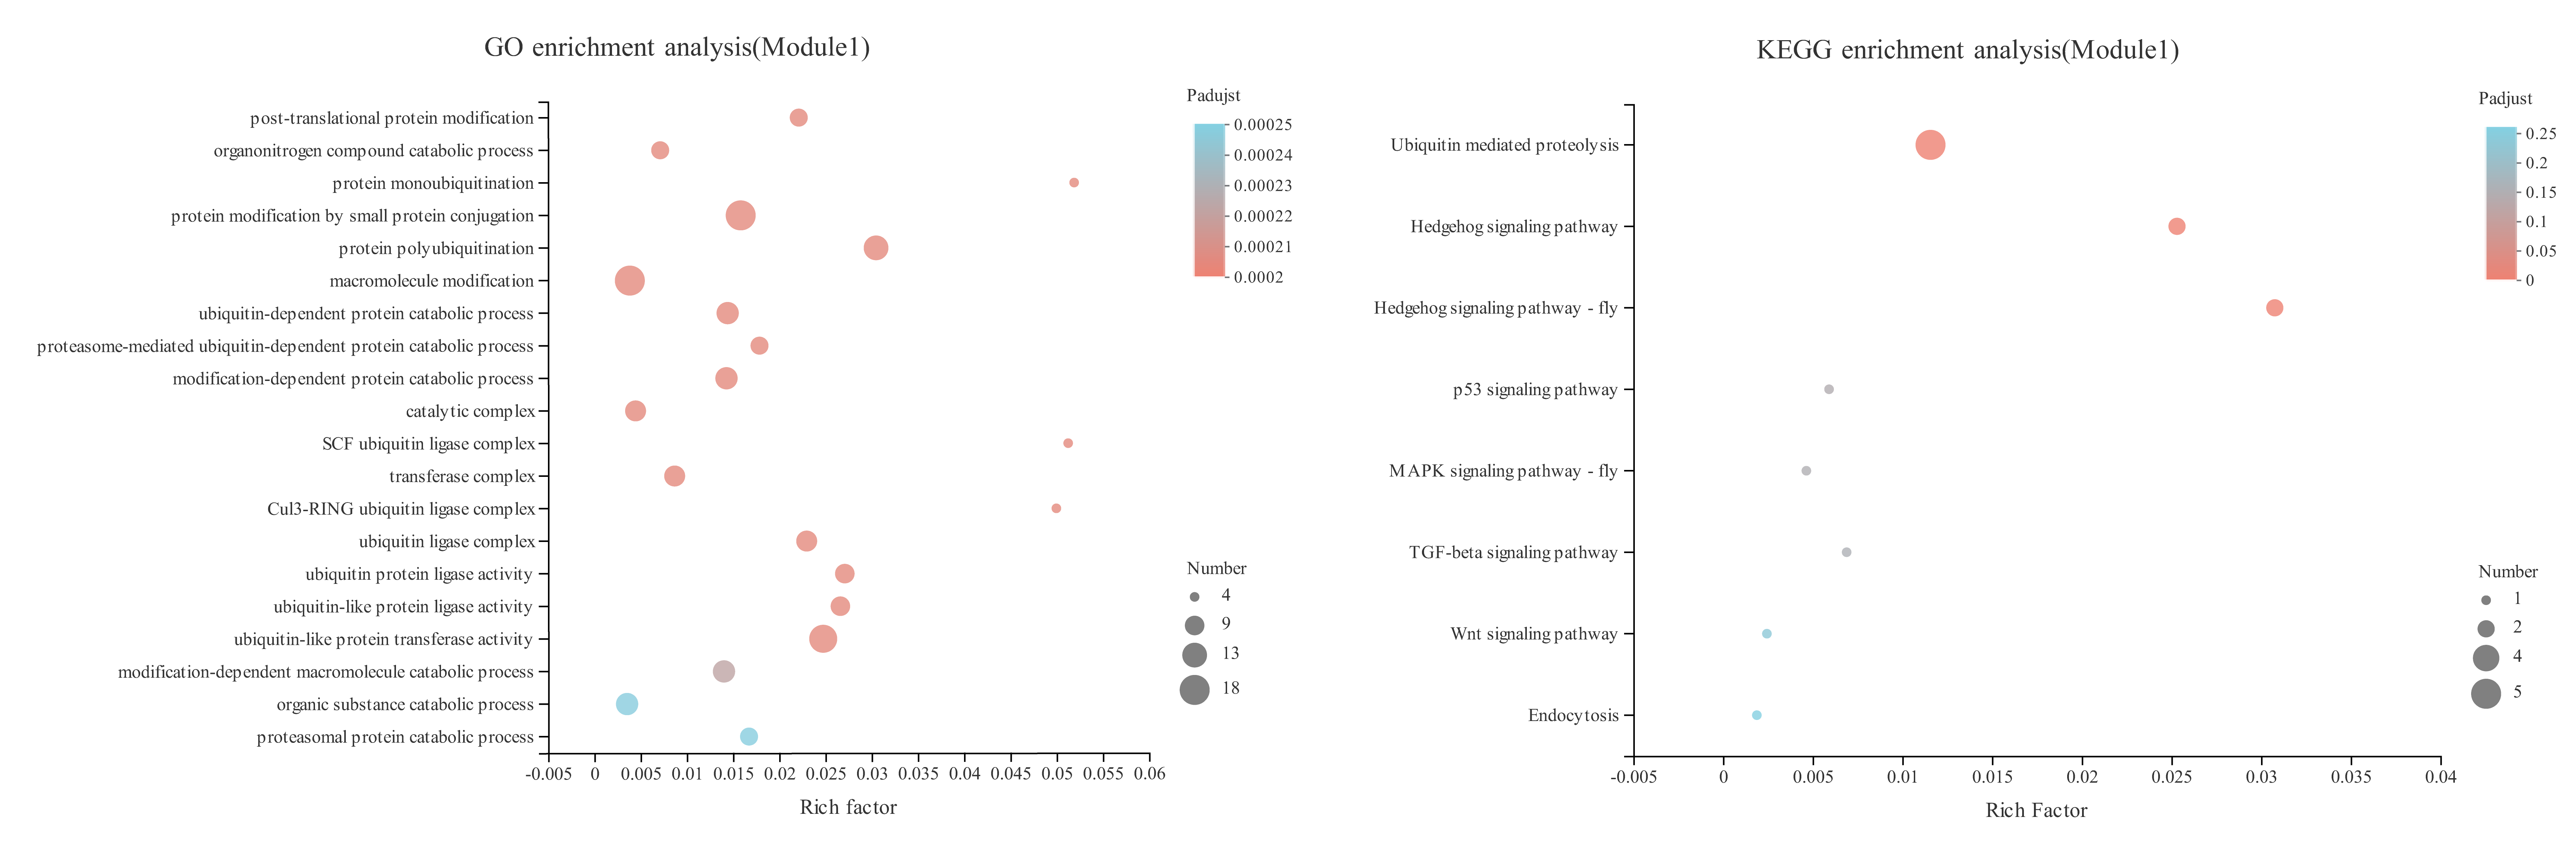
**

Bubble diagram of top 20 enriched GO terms and KEGG pathways for Module 1.

**Figure S4**

**
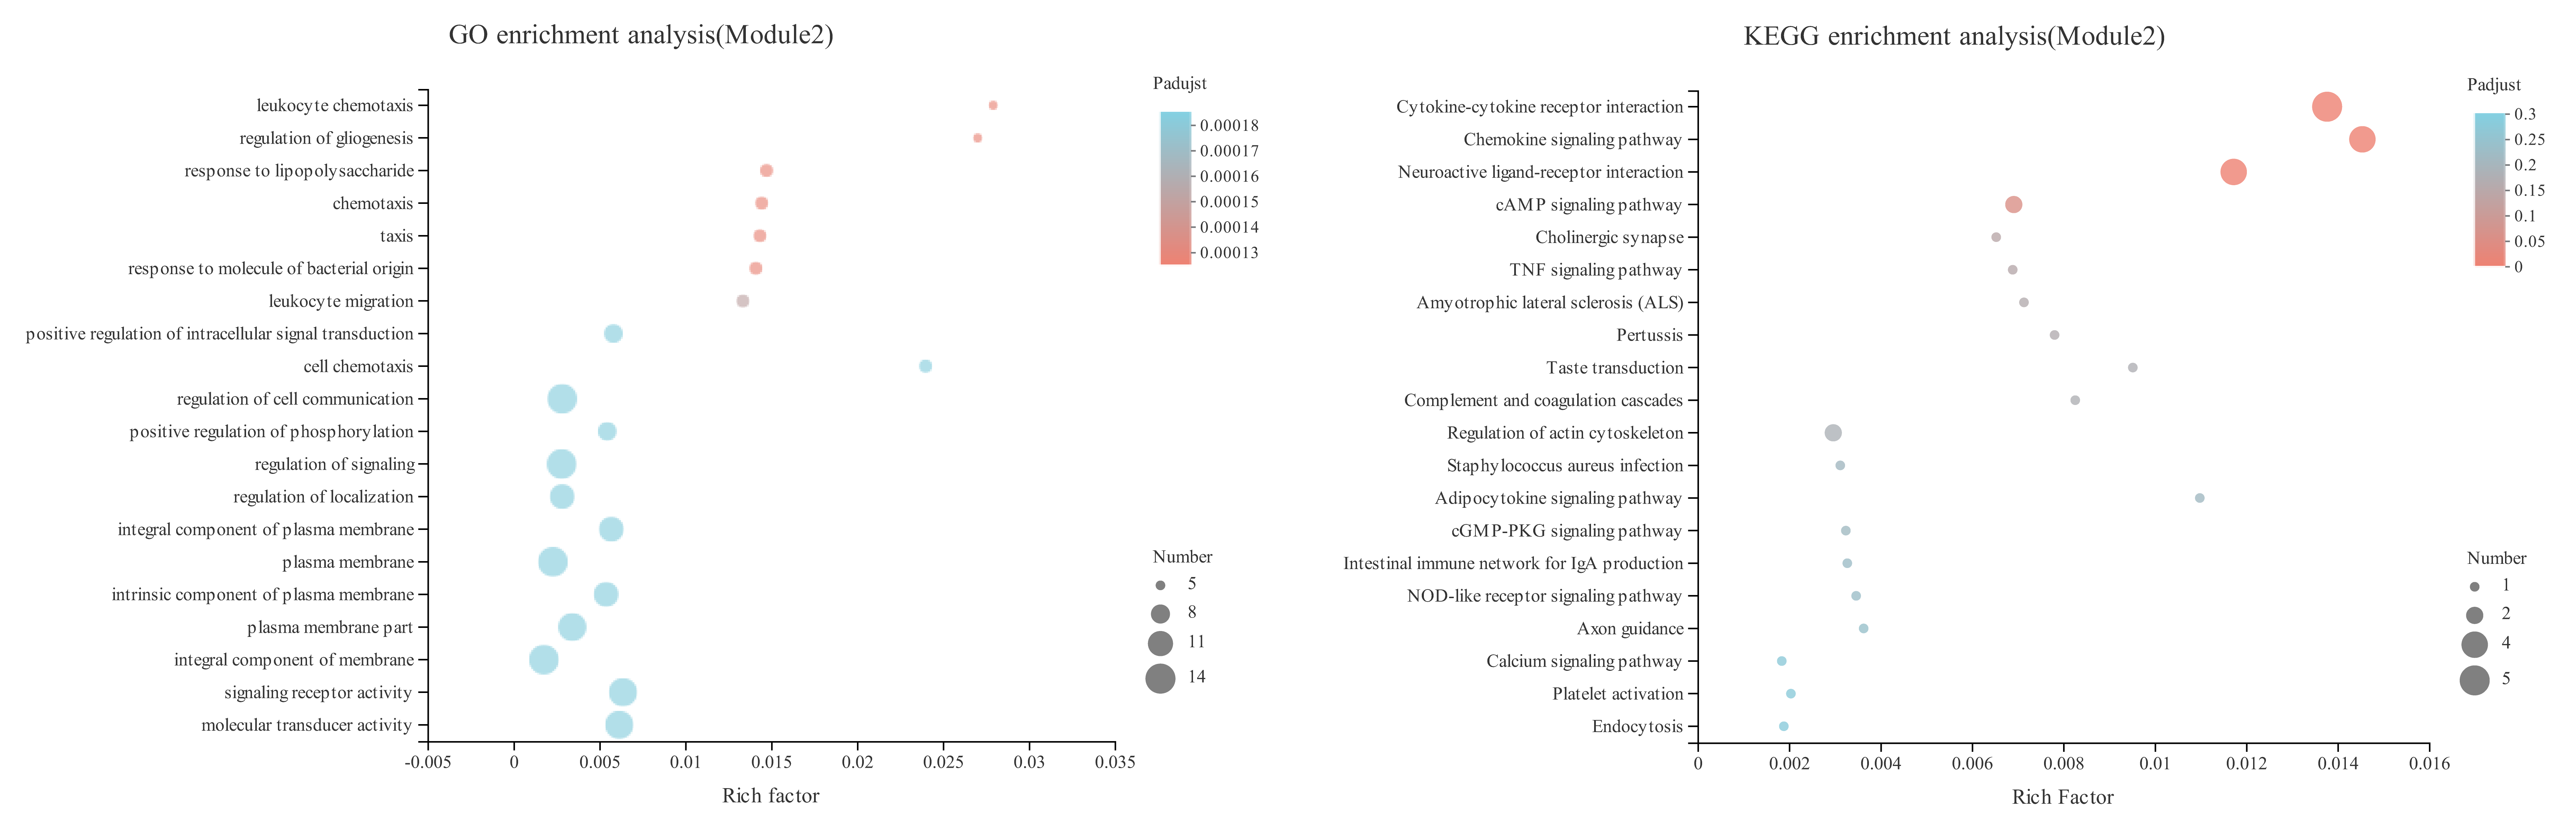
**

Bubble diagram of top 20 enriched GO terms and KEGG pathways for Module 2.

# Table

Table S1

Amplification information of mRNA

| Sample | Total reads | Total mapped | Multiple mapped | Uniquely mapped |
| --- | --- | --- | --- | --- |
| H1 | 50342632 | 48674808(96.69%) | 4171338(8.29%) | 44503470(88.4%) |
| H2 | 46241498 | 44556211(96.36%) | 2569534(5.56%) | 41986677(90.8%) |
| H3 | 51031430 | 49306690(96.62%) | 1689458(3.31%) | 47617232(93.31%) |
| H4 | 46997382 | 45390281(96.58%) | 1578050(3.36%) | 43812231(93.22%) |
| T1 | 49958130 | 48164108(96.41%) | 1842468(3.69%) | 46321640(92.72%) |
| T2 | 45886086 | 44123577(96.16%) | 1318302(2.87%) | 42805275(93.29%) |
| T3 | 45209296 | 43575278(96.39%) | 1297989(2.87%) | 42277289(93.51%) |
| T4 | 49593278 | 47883604(96.55%) | 1833605(3.7%) | 46049999(92.86%) |

Total reads: the amount of reads obtained by filtered sequences, or clean reads; Total mapped: the amount of clean reads located on the genome; Multiple mapped: the amount of clean reads with multiple alignment locations on the reference genome; Uniquely mapped: the amount of clean reads with unique mapped location on the reference genome.

Table S2

Amplification information of miRNA

| Sample | Total reads | Total mapped | Mapped reads (+) | Mapped reads (-) |
| --- | --- | --- | --- | --- |
| H1 | 9291549 | 6543190 | 4678617 | 3893094 |
| H2 | 11637296 | 9551440 | 7286690 | 5344442 |
| H3 | 11520595 | 9439164 | 7140834 | 5474813 |
| H4 | 11954840 | 9999505 | 7588002 | 5653940 |
| T1 | 11256792 | 9579129 | 7129965 | 5412554 |
| T2 | 14229645 | 10173970 | 7835745 | 5953862 |
| T3 | 18720144 | 15550608 | 11238527 | 10016035 |
| T4 | 11946582 | 9291865 | 7015562 | 5507449 |

Total reads: the amount of filtered sequences; Total mapped: the amount of reads located on the genome; Mapped reads (+): the amount of reads aligned to the positive strand of the genome; Mapped reads (-): the amount of reads aligned to the negative strand of the genome.
